# Supplementary material for: Different sites of insertion in the reaction of isocyanates with [Re(N(R)Ar)(CO)3(bipy)] (R = H or Me): N–H vs. Re–N
Source: Royal Society of Chemistry journal article supplement (doi:10.1039/b203261a), 2002-01-01
Supplement: b203261a.doc [file b203261a.doc]

## Experimental Section

**General Procedures.** All manipulations were carried out under nitrogen using standard Schlenk techniques. Solvents were distilled from Na (hexanes), Na/benzophenone (tetrahydrofuran) and CaH2 (CH2Cl2). CD2Cl2 was dried over 4Å molecular sieves and stored in the dark over Na2CO3. Elemental analyses were obtained using a Perkin-Elmer 240-B microanalyzer. The IR and 1H NMR spectra were recorded on Perkin-Elmer FT 1720-X (over the range 2200-1750 cm-1), and Bruker AC-200 (or AC-300) spectrometers respectively.

The complex [Re(OTf)(CO)3(bipy)] was prepared in an almost quantitative yield by the reaction of equimolar amounts of [ReBr(CO)3(bipy)] with AgOTf in CH2Cl2 in the dark, followed by filtration through diatomaceous earth to remove AgBr according to the literature procedure.[[1]](#footnote-2)

Complexes [Re(NAr(R))(CO)3(bipy)] (R= H; Ar= *p*Tol, **1**; R=Ar=Ph, **2)** were prepared as described in the reference number 7 of the manuscript.

**X-ray structures**. Data in common: Bruker AXS SMART 1000 CCD diffractometer, **and** scans, MoKradiation (=0.71073 Å), graphite monochromator, *T* = 295 K. Raw frame data integrated with the SAINT[[2]](#footnote-3) program. Structures were solved by direct methods with SHELXTL.[[3]](#footnote-4) A semi-empirical absorption correction was done with SADABS.[[4]](#footnote-5) All non-hydrogen atoms were refined anisotropically. Hydrogen atoms were set in calculated positions and refined as riding atoms, with a common thermal parameter. All calculations were made with SHELXTL.

Crystallographic data (excluding structure factors) for the structures reported in this paper have been deposited with the Cambridge Crystallographic Data Centre as supplementary publication no. CCDC 182882 and 182883. Copies of the data can be obtained free of charge on application to CCDC, 12 Union Road, Cambridge, CB21EZ, UK (fax: (+44)1223-336-033; e-mail: deposit@ccdc.cam.ac.uk).

**Preparation of [Re(NMePh)(CO)3(bipy)] (3).** A solution of KNMePh (prepared by the reaction of HNMePh (10 L, 0.094 mmol) and KN(SiMe3)2 (0.188 ml of a solution 0.5 M in toluene, 0.094 mmol) in THF (5 mL) at –78ºC) was added to a solution of [Re(OTf)(CO)3(bipy)] (0.050 g, 0.086 mmol) in THF (15 mL) cooled to –78ºC. The color of the solution changed from yellow to green. After 15 minutes stirring at low temperature, the mixture was allowed to reach room temperature. Volatiles were removed under vacuum, the green solid was extracted with CH2Cl2 (210 mL) and the solution was filtered using a cannula tipped with filter paper. Slow diffusion of hexanes into a solution of **3** in THF at –20ºC afforded a green microcystalline solid.Yield: 0.036 g, 73%. Anal. Calcd. for C20H16N3O3Re: C, 45.10; H, 3.02; N, 7.88. Found: C, 45.21; H, 3.10; N, 7.79. IR (THF): 2006, 1896, 1877. 1H NMR (CD2Cl2): 9.20 [m, 2H, bipy], 8.02 [m, 4H, bipy], 7.48 [m, 2H, bipy], 6.72 [m, 2H, Ph], 6.30 [m, 2H, Ph], 6.02 [m,1H, Ph], 2.39 [s, 3H, NMe]. Significant descomposition of **3** was observed upon standing in solution during periods more than 30 minutes, precluding the adquisition of the 13C NMR spectrum.

**Reaction of 1 with EtNCO.** EtNCO (6.6 L, 0.109 mmol) was added to a solution of **1** (0.050 g, 0.086 mmol) in THF (15 mL). The color of the solution changed from green to red. Solvent was removed under vacuum and the red solid was redisolved in CH2Cl2 (5mL). Slow diffusion of hexanes into this solution at room temperature afforded red crystals, one of which was employed for an X-ray structure determination. Yield: 95% (0.046 g). Anal. Calcd. for C23H21N4O4Re: C, 45.76; H, 3.50; N, 9.28. Found: C, 45.68; H, 3.46; N, 9.19. IR(THF): 2014, 1913, 1886. 1H NMR(CD2Cl2): 8.78, 8.07, 7.92, 7.24 [m, 2H each, bipy], 6.68, 6.65, 6.17, 6.14 [AA’BB’, 4H, *p*Tol], 3.34[s, broad, 1H, N*H*], 2.83 [q (7.1), 2H, NC*H*2CH3], 2.07 [s, 3H, CH3,*p*Tol], 0.70 [t (7.1), 3H, NCH2C*H*3]. 13C1H NMR(CD2Cl2): 199.66 [2CO], 193.82 [CO], 162.63 [O=C], 155.70, 154.67 [bipy], 148.70 [*p*Tol], 138.76 [bipy],132.73, 129.51, 128.15 [*p*Tol], 126.42, 122.58 [bipy], 36.39 [N*C*H2CH3], 20.79 [CH3,*p*Tol], 15.91 [N*C*H2*C*H3].

**Reaction of 1 with *t*BuNCO.***t*BuNCO (9.5 L, 0.083 mmol) was added to a solution of **1** (0.050 g, 0.083 mmol) in THF (15mL). Subsequent workup as described for **4a**, afforded red crystals of **4b**. Yield: 92% (0.048 g). Anal. Calcd. for C25H25N4O4Re: C, 47.53; H, 3.98; N, 8.86. Found: C, 47.57; H, 3.95; N, 8.89. IR(THF): 2014, 1913, 1887. 1H NMR(CD2Cl2): 8.81, 8.09, 7.91, 7.23 [m, 2H each, bipy], 6.67, 6.63, 6.17, 6.13 [AA’BB’, 4H, *p*Tol], 3.40[s, broad, 1H, N*H*], 2.14 [s, 3H, CH3,*p*Tol], 0.92 [s, 9H, NC(C*H*3)3]. 13C1H NMR(CD2Cl2): 199.72 [2CO], 193.89 [CO], 161.93 [O=C], 155.65, 154.88 [bipy], 149.29 [*p*Tol], 138.62 [bipy], 132.28 [*p*Tol], 129.45 127.97 [*p*Tol], 126.12, 122.37 [bipy], 49.86 [N*C*(CH3)3]], 29.55 [NC(*C*H3)3]], 20.72 [CH3,*p*Tol].

**Reaction of 1 with PhNCO.** PhNCO (9 L, 0.083 mmol) was added to a solution of **1** (0.050 g, 0.083 mmol) in THF (15 mL),. The color of the solution changed from green to red inmediately. The solvent was removed under vacuum to give the mixture the isomers shown in Scheme2 ina 3:4 ratio. Yield: 91% (0.049 g). Anal. Calcd. for C27H21N4O4Re: C, 49.76; H, 3.24; N, 8.59. Found: C, 49.68; H, 3.35; N, 8.63. IR(THF): 2014, 1913, 1886. 1H NMR(CD2Cl2): 8.83, 8.10, 7.96, 7.24 [m, bipy], 7.01, 6.86, 6.74 [m, Ph], 6.43, 6.39, 6.30, 6.26, 5.63, 5.50 [AA’BB’,*p*Tol], 2.31 [s, broad, N*H*], 2.21 [s, C*H*3, *p*Tol, major], 2.15 [s, C*H*3, *p*Tol, minor]. 13C1H NMR(CD2Cl2): 199.32 [2CO], 193.58 [CO], 159.16 [O=C], 155.74, 154.55 [bipy], 150.60, 141.78 [*p*Tol, Ph], 139.02 [bipy], 133.67, 130.61, 128.98, 127.77 [*p*Tol, Ph], 126.61, 122.77 [bipy], 121.04, 118.91 [*p*Tol, Ph], 20.85 [CH3,*p*Tol] (mayor). 199.32 [2CO], 193.07 [CO], 159.28 [O=C], 156.115, 154.60 [bipy], 147.65, 140.07 [*p*Tol, Ph], 139.02 [bipy], 130.81, 129.36, 127.84, 127.36 [*p*Tol, Ph], 126.67, 122.77 [bipy], 120.97, 119.66 [*p*Tol, Ph], 20.65 [CH3,*p*Tol] (minor).

**Reaction of 3 with *p*TolNCO.** *p*TolNCO (10 L, 0.083 mmol) was added to a solution of **3** (0.050 g, 0.083 mmol) in THF (15 mL). The mixture was stirred for 15 minutes and the color of the solution changed from green to orange. The solvent was removed under vacuum and the solid residue was redissolved in CH2Cl2 (5 mL). Slow diffusion of hexanes into this solution of CH2Cl2 at low temperature (-20ºC) afforded orange crystals, one of which was used for an X-ray diffraction determination of the structure. Yield: 88% (0.048 g). Anal. Calcd. for C28H25N4O4Re: C, 50.36; H, 3.77; N, 8.39. Found: C, 50.31; H, 3.75; N, 8.43. IR(THF): 2014, 1913, 1888. 1H NMR(CD2Cl2): 8.89, 8.04, 7.94, 7.26 [m, 2H each, bipy], 6.90 [m, 3H, Ph], 6.63 [m, 2H, Ph] 6.44, 6.40, 6.29, 6.25 [AA’BB’, 4H, *p*Tol], 2.59 [s, 3H, NC*H*3], 2.02 [s, 3H, CH3, *p*Tol]. 13C1H NMR(CD2Cl2): 199.17 [2CO], 193.82 [CO], 166.10 [O=C], 155.73, 155.14 [bipy], 148.72, 148.14 [*p*Tol, Ph], 138.91 [bipy], 131.35, 128.59, 128.34 [*p*Tol, Ph], 126.77, 126.36 [ bipy, *p*Tol], 122.49 [bipy], 121.17, 119.17 [Ph], 37.69 [N*C*H3]], 20.63 [CH3,*p*Tol].

Table 1. Crystal data and structure refinement for**4a**.

Empirical formula C23 H21 N4 O4 Re. 0.5 CH2Cl2

Formula weight 646.10

Temperature 295(2) K

Wavelength 0.71073 Å

Crystal system Monoclinic

Space group P2(1)/c

Unit cell dimensions a = 17.650(2) Å = 90°.

b = 8.5444(11) Å = 105.882(2)°.

c = 16.448(2) Å  = 90°.

Volume 2385.8(5) Å3

Z 4

Density (calculated) 1.799 Mg/m3

Absorption coefficient 5.243 mm-1

F(000) 1260

Crystal size 0.06 x 0.08 x 0.18 mm3

Theta range for data collection 1.20 to 23.27°.

Index ranges -19<=h<=15, -9<=k<=9, -14<=l<=18

Reflections collected 10333

Independent reflections 3444 [R(int) = 0.0332]

Completeness to theta = 23.27° 99.9 %

Absorption correction SADABS

Max. and min. transmission 1.000000 and 0.704555

Refinement method Full-matrix least-squares on F2

Data / restraints / parameters 3444 / 0 / 301

Goodness-of-fit on F2 1.005

Final R indices [I>2sigma(I)] R1 = 0.0255, wR2 = 0.0544

R indices (all data) R1 = 0.0356, wR2 = 0.0606

Largest diff. peak and hole 1.058 and -1.067 e.Å-3

Table 2. Atomic coordinates ( x 104) and equivalent isotropic displacement parameters (Å2x 103)

for **4a** U(eq) is defined as one third of the trace of the orthogonalized Uij tensor.

________________________________________________________________________________

x y z U(eq)

________________________________________________________________________________

Re(1) 2843(1) 8833(1) 8076(1) 33(1)

N(1) 1770(3) 10250(5) 7736(3) 35(1)

N(2) 3177(3) 11118(5) 8652(3) 34(1)

N(3) 2486(3) 8333(5) 9218(3) 37(1)

N(4) 1741(3) 7111(6) 10003(3) 53(2)

C(1) 3160(4) 9419(7) 7100(4) 44(2)

O(1) 3383(3) 9763(6) 6523(3) 67(1)

C(2) 2372(4) 6969(8) 7478(4) 44(2)

O(2) 2092(3) 5930(5) 7069(3) 66(1)

C(3) 3804(4) 7741(7) 8452(4) 47(2)

O(3) 4396(3) 7062(6) 8679(3) 68(1)

C(4) 1871(3) 7381(6) 9235(4) 36(1)

O(4) 1449(2) 6769(5) 8588(2) 42(1)

C(5) 1101(4) 6115(8) 10100(4) 55(2)

C(6) 1287(5) 4414(9) 10174(5) 84(3)

C(11) 1063(3) 9702(8) 7309(3) 43(2)

C(12) 413(4) 10656(8) 7049(4) 50(2)

C(13) 495(4) 12210(9) 7244(4) 53(2)

C(14) 1204(4) 12789(8) 7706(4) 52(2)

C(15) 1837(3) 11766(7) 7957(3) 37(1)

C(16) 2614(4) 12250(7) 8497(3) 38(2)

C(17) 2759(4) 13704(7) 8867(4) 51(2)

C(18) 3492(5) 13999(8) 9410(4) 60(2)

C(19) 4055(4) 12879(8) 9568(4) 58(2)

C(20) 3887(4) 11446(7) 9171(3) 44(2)

C(21) 2918(3) 9052(6) 10003(3) 34(1)

C(22) 3631(4) 8471(7) 10458(4) 46(2)

C(23) 4059(4) 9196(7) 11203(4) 49(2)

C(24) 3785(4) 10523(7) 11503(4) 46(2)

C(25) 3065(4) 11108(7) 11033(4) 48(2)

C(26) 2634(4) 10400(7) 10303(4) 43(2)

C(27) 4253(4) 11309(8) 12305(4) 64(2)

Cl(91) -168(2) 5613(4) 5760(2) 148(1)

C(90) 463(10) 4810(20) 5429(11) 100

________________________________________________________________________________

Table 3. Bond lengths [Å] and angles [°] for **4a**

_____________________________________________________

Re(1)-C(3) 1.885(7)

Re(1)-C(1) 1.905(7)

Re(1)-C(2) 1.936(7)

Re(1)-N(2) 2.180(5)

Re(1)-N(3) 2.182(5)

Re(1)-N(1) 2.188(5)

N(1)-C(11) 1.337(7)

N(1)-C(15) 1.342(7)

N(2)-C(20) 1.339(7)

N(2)-C(16) 1.360(7)

N(3)-C(4) 1.362(7)

N(3)-C(21) 1.445(7)

N(4)-C(4) 1.365(7)

N(4)-C(5) 1.458(8)

C(1)-O(1) 1.161(7)

C(2)-O(2) 1.141(7)

C(3)-O(3) 1.165(7)

C(4)-O(4) 1.236(6)

C(5)-C(6) 1.487(9)

C(11)-C(12) 1.377(8)

C(12)-C(13) 1.365(9)

C(13)-C(14) 1.366(9)

C(14)-C(15) 1.389(8)

C(15)-C(16) 1.474(8)

C(16)-C(17) 1.376(8)

C(17)-C(18) 1.378(9)

C(18)-C(19) 1.353(9)

C(19)-C(20) 1.380(8)

C(21)-C(22) 1.369(8)

C(21)-C(26) 1.398(8)

C(22)-C(23) 1.397(8)

C(23)-C(24) 1.376(8)

C(24)-C(25) 1.388(9)

C(24)-C(27) 1.509(8)

C(25)-C(26) 1.375(8)

Cl(91)-C(90) 1.531(17)

Cl(91)-C(90)#1 1.915(17)

C(90)-C(90)#1 1.87(3)

C(90)-Cl(91)#1 1.915(17)

C(3)-Re(1)-C(1) 87.8(3)

C(3)-Re(1)-C(2) 89.0(3)

C(1)-Re(1)-C(2) 88.4(3)

C(3)-Re(1)-N(2) 100.9(2)

C(1)-Re(1)-N(2) 91.4(2)

C(2)-Re(1)-N(2) 170.1(2)

C(3)-Re(1)-N(3) 93.8(2)

C(1)-Re(1)-N(3) 176.0(2)

C(2)-Re(1)-N(3) 95.2(2)

N(2)-Re(1)-N(3) 84.75(16)

C(3)-Re(1)-N(1) 174.7(2)

C(1)-Re(1)-N(1) 94.1(2)

C(2)-Re(1)-N(1) 95.9(2)

N(2)-Re(1)-N(1) 74.19(17)

N(3)-Re(1)-N(1) 83.93(16)

C(11)-N(1)-C(15) 118.8(5)

C(11)-N(1)-Re(1) 123.9(4)

C(15)-N(1)-Re(1) 117.3(4)

C(20)-N(2)-C(16) 118.6(5)

C(20)-N(2)-Re(1) 124.0(4)

C(16)-N(2)-Re(1) 117.3(4)

C(4)-N(3)-C(21) 117.7(5)

C(4)-N(3)-Re(1) 123.6(4)

C(21)-N(3)-Re(1) 118.7(4)

C(4)-N(4)-C(5) 122.1(5)

O(1)-C(1)-Re(1) 177.3(5)

O(2)-C(2)-Re(1) 174.8(5)

O(3)-C(3)-Re(1) 179.6(6)

O(4)-C(4)-N(3) 122.1(6)

O(4)-C(4)-N(4) 120.7(5)

N(3)-C(4)-N(4) 117.1(5)

N(4)-C(5)-C(6) 114.8(6)

N(1)-C(11)-C(12) 122.3(6)

C(13)-C(12)-C(11) 118.5(6)

C(12)-C(13)-C(14) 120.4(6)

C(13)-C(14)-C(15) 118.5(6)

N(1)-C(15)-C(14) 121.5(6)

N(1)-C(15)-C(16) 115.7(5)

C(14)-C(15)-C(16) 122.8(6)

N(2)-C(16)-C(17) 121.3(6)

N(2)-C(16)-C(15) 115.2(5)

C(17)-C(16)-C(15) 123.4(6)

C(16)-C(17)-C(18) 118.7(6)

C(19)-C(18)-C(17) 120.3(6)

C(18)-C(19)-C(20) 119.0(6)

N(2)-C(20)-C(19) 122.0(6)

C(22)-C(21)-C(26) 118.1(5)

C(22)-C(21)-N(3) 121.0(5)

C(26)-C(21)-N(3) 120.8(5)

C(21)-C(22)-C(23) 120.9(6)

C(24)-C(23)-C(22) 121.4(6)

C(23)-C(24)-C(25) 117.1(6)

C(23)-C(24)-C(27) 121.2(6)

C(25)-C(24)-C(27) 121.7(6)

C(26)-C(25)-C(24) 122.1(6)

C(25)-C(26)-C(21) 120.3(6)

C(90)-Cl(91)-C(90)#1 64.7(10)

Cl(91)-C(90)-C(90)#1 67.6(11)

Cl(91)-C(90)-Cl(91)#1 115.3(10)

C(90)#1-C(90)-Cl(91)#1 47.7(8)

_____________________________________________________________

Symmetry transformations used to generate equivalent atoms:

#1 -x,-y+1,-z+1

Table 4. Anisotropic displacement parameters (Å2x 103) for **4a**. The anisotropic

displacement factor exponent takes the form: -22[ h2 a*2U11 + ... + 2 h k a* b* U12 ]

______________________________________________________________________________

U11 U22 U33 U23 U13 U12

______________________________________________________________________________

Re(1) 32(1) 36(1) 31(1) 0(1) 8(1) 3(1)

N(1) 37(3) 39(3) 31(3) 1(2) 10(2) 4(2)

N(2) 31(3) 42(3) 27(2) 3(2) 5(2) -6(2)

N(3) 39(3) 42(3) 24(3) 0(2) 1(2) 0(2)

N(4) 60(4) 68(4) 30(3) -4(3) 13(3) -30(3)

C(1) 49(4) 38(4) 39(4) -1(3) 5(3) 9(3)

O(1) 92(4) 68(3) 51(3) 4(3) 38(3) -1(3)

C(2) 40(4) 59(4) 35(4) 3(3) 13(3) 8(3)

O(2) 81(4) 59(3) 60(3) -28(3) 23(3) -16(3)

C(3) 55(5) 43(4) 45(4) -2(3) 18(3) 0(3)

O(3) 51(3) 75(4) 73(3) 8(3) 13(3) 23(3)

C(4) 32(4) 32(3) 41(4) 5(3) 4(3) 5(3)

O(4) 37(2) 50(3) 35(2) -9(2) 4(2) -9(2)

C(5) 54(4) 72(5) 42(4) -4(4) 18(3) -18(4)

C(6) 98(7) 67(6) 99(6) -2(5) 46(5) -23(5)

C(11) 33(4) 56(4) 37(4) 3(3) 2(3) 0(3)

C(12) 36(4) 68(5) 40(4) 10(3) 4(3) 4(3)

C(13) 31(4) 71(5) 57(4) 18(4) 11(3) 21(4)

C(14) 50(5) 46(4) 64(5) 11(3) 20(4) 17(4)

C(15) 37(4) 40(4) 37(3) 6(3) 14(3) 6(3)

C(16) 47(4) 33(4) 35(3) 3(3) 16(3) 1(3)

C(17) 67(5) 38(4) 49(4) 1(3) 18(4) 0(4)

C(18) 84(6) 46(4) 51(4) -10(3) 22(4) -15(4)

C(19) 52(5) 65(5) 48(4) -2(4) 0(3) -18(4)

C(20) 41(4) 51(4) 40(3) 2(3) 9(3) -9(3)

C(21) 34(3) 38(4) 28(3) 3(3) 7(3) -8(3)

C(22) 55(4) 39(4) 40(4) -7(3) 6(3) 1(3)

C(23) 46(4) 58(5) 38(4) 2(3) 1(3) -1(3)

C(24) 60(5) 45(4) 35(4) -3(3) 15(3) -15(3)

C(25) 62(5) 39(4) 44(4) -4(3) 21(3) -5(4)

C(26) 40(4) 47(4) 39(4) -1(3) 8(3) 1(3)

C(27) 73(5) 77(5) 38(4) -15(4) 7(3) -21(4)

Table 5. Hydrogen coordinates ( x 104) and isotropic displacement parameters (Å2x 10 3)

for **4a**.

________________________________________________________________________________

x y z U(eq)

________________________________________________________________________________

H(4) 2046 7543 10445 63

H(5A) 647 6275 9618 66

H(5B) 954 6444 10601 66

H(6A) 1373 4046 9655 127

H(6B) 854 3854 10285 127

H(6C) 1753 4246 10629 127

H(11) 1009 8639 7184 52

H(12) -72 10250 6748 59

H(13) 67 12879 7062 64

H(14) 1262 13844 7849 62

H(17) 2371 14472 8754 61

H(18) 3599 14973 9668 72

H(19) 4548 13071 9937 69

H(20) 4279 10686 9268 53

H(22) 3833 7581 10267 56

H(23) 4540 8773 11503 59

H(25) 2868 12009 11219 57

H(26) 2151 10819 10006 51

H(27A) 4710 10692 12562 97

H(27B) 3932 11403 12690 97

H(27C) 4413 12331 12175 97

H(90A) 836 5628 5601 100

H(90B) 516 3900 5798 100

_______________________________________________________________________________

Table 6. Crystal data and structure refinement for **5**

Empirical formula C28 H23 N4 O4 Re

Formula weight 665.70

Temperature 299(2) K

Wavelength 0.71073Å

Crystal system Monoclinic

Space group P2(1)/n

Unit cell dimensions a = 10.056(2) Å = 90º.

b = 25.335(6) Å = 98.774(4)º.

c = 10.233(2) Å  = 90º.

Volume 2576.7(10) Å 3

Z 4

Density (calculated) 1.716 Mg/m3

Absorption coefficient 4.757 mm-1

F(000) 1304

Crystal size 0.12 x 0.13 x 0.16 mm3

Theta range for data collection 1.61 to 23.28º.

Index ranges -11<=h<=11, -28<=k<=22, -11<=l<=10

Reflections collected 11333

Independent reflections 3699 [R(int) = 0.0655]

Completeness to theta = 23.28∞ 99.5 %

Absorption correction SADABS

Max. and min. transmission 1.00000 and 0.652079

Refinement method Full-matrix least-squares on F2

Data / restraints / parameters 3699 / 0 / 336

Goodness-of-fit on F2 1.031

Final R indices [I>2sigma(I)] R1 = 0.0547, wR2 = 0.1176

R indices (all data) R1 = 0.0843, wR2 = 0.1293

Largest diff. peak and hole 3.165 and -1.486 e. Å –3

Table 7. Atomic coordinates ( x 104) and equivalent isotropic displacement parameters (Å 2x 103)

for **5** U(eq) is defined as one third of the trace of the orthogonalized Uij tensor.

________________________________________________________________________________

x y z U(eq)

________________________________________________________________________________

Re(1) 2240(1) 1004(1) 10528(1) 35(1)

N(1) 539(7) 1452(3) 9583(9) 29(2)

N(2) 1856(9) 730(3) 8510(9) 35(2)

N(3) 3397(8) 1602(3) 9678(9) 32(2)

N(4) 4043(8) 2492(3) 9379(10) 41(3)

C(1) 1150(12) 470(5) 11192(13) 45(3)

O(1) 564(10) 155(4) 11613(11) 78(3)

C(2) 3771(12) 574(5) 11218(12) 43(3)

O(2) 4615(9) 313(4) 11620(10) 72(3)

C(3) 2471(10) 1322(5) 12231(13) 45(3)

O(3) 2577(10) 1514(4) 13273(10) 72(3)

C(4) 3254(11) 2114(4) 9965(12) 39(3)

O(4) 2501(8) 2272(3) 10723(8) 52(2)

C(11) -97(11) 1827(4) 10205(13) 43(3)

C(12) -1090(12) 2128(5) 9567(16) 59(4)

C(13) -1477(12) 2063(6) 8233(16) 63(4)

C(14) -834(12) 1687(5) 7569(14) 54(4)

C(15) 150(11) 1386(5) 8288(12) 40(3)

C(16) 877(11) 963(4) 7676(12) 39(3)

C(17) 612(13) 830(5) 6354(13) 54(3)

C(18) 1377(15) 459(6) 5870(14) 66(4)

C(19) 2371(14) 215(5) 6694(14) 60(4)

C(20) 2569(12) 353(4) 7995(13) 47(3)

C(21) 4167(11) 1455(4) 8674(11) 33(3)

C(22) 3816(12) 1594(4) 7363(12) 45(3)

C(23) 4546(17) 1396(6) 6428(14) 68(4)

C(24) 5625(15) 1067(6) 6770(17) 64(4)

C(25) 5988(13) 949(5) 8050(14) 51(3)

C(26) 5286(11) 1143(4) 8997(12) 41(3)

C(27) 6320(19) 828(8) 5668(18) 111(7)

C(31) 3423(11) 2935(5) 8772(11) 40(3)

C(32) 2065(12) 2933(5) 8330(13) 53(3)

C(33) 1488(14) 3371(6) 7685(14) 67(4)

C(34) 2226(19) 3809(5) 7473(15) 72(5)

C(35) 3562(16) 3799(5) 7896(14) 55(4)

C(36) 4157(13) 3370(4) 8543(12) 45(3)

C(40) 5467(12) 2470(5) 9699(14) 59(4)

________________________________________________________________________________

Table 7. Bond lengths [Å] and angles [º] for **5**

_____________________________________________________

Re(1)-C(3) 1.902(15)

Re(1)-C(1) 1.928(12)

Re(1)-C(2) 1.929(12)

Re(1)-N(1) 2.155(7)

Re(1)-N(2) 2.157(9)

Re(1)-N(3) 2.171(8)

N(1)-C(15) 1.334(14)

N(1)-C(11) 1.358(13)

N(2)-C(16) 1.338(14)

N(2)-C(20) 1.348(14)

N(3)-C(4) 1.344(13)

N(3)-C(21) 1.427(13)

N(4)-C(31) 1.384(14)

N(4)-C(40) 1.421(15)

N(4)-C(4) 1.432(14)

C(1)-O(1) 1.117(13)

C(2)-O(2) 1.105(13)

C(3)-O(3) 1.162(15)

C(4)-O(4) 1.231(13)

C(11)-C(12) 1.343(16)

C(12)-C(13) 1.371(19)

C(13)-C(14) 1.386(18)

C(14)-C(15) 1.371(16)

C(15)-C(16) 1.487(16)

C(16)-C(17) 1.381(17)

C(17)-C(18) 1.355(18)

C(18)-C(19) 1.356(19)

C(19)-C(20) 1.362(17)

C(21)-C(26) 1.374(15)

C(21)-C(22) 1.379(15)

C(22)-C(23) 1.387(18)

C(23)-C(24) 1.37(2)

C(24)-C(25) 1.34(2)

C(24)-C(27) 1.538(19)

C(25)-C(26) 1.375(16)

C(31)-C(36) 1.366(15)

C(31)-C(32) 1.371(15)

C(32)-C(33) 1.375(17)

C(33)-C(34) 1.37(2)

C(34)-C(35) 1.35(2)

C(35)-C(36) 1.364(17)

C(3)-Re(1)-C(1) 88.3(5)

C(3)-Re(1)-C(2) 85.7(5)

C(1)-Re(1)-C(2) 86.6(5)

C(3)-Re(1)-N(1) 99.5(4)

C(1)-Re(1)-N(1) 94.1(4)

C(2)-Re(1)-N(1) 174.7(4)

C(3)-Re(1)-N(2) 173.1(4)

C(1)-Re(1)-N(2) 94.8(5)

C(2)-Re(1)-N(2) 100.7(4)

N(1)-Re(1)-N(2) 74.1(3)

C(3)-Re(1)-N(3) 94.2(4)

C(1)-Re(1)-N(3) 176.9(4)

C(2)-Re(1)-N(3) 95.4(4)

N(1)-Re(1)-N(3) 83.7(3)

N(2)-Re(1)-N(3) 82.5(3)

C(15)-N(1)-C(11) 117.7(9)

C(15)-N(1)-Re(1) 118.2(7)

C(11)-N(1)-Re(1) 123.9(8)

C(16)-N(2)-C(20) 116.6(11)

C(16)-N(2)-Re(1) 118.3(8)

C(20)-N(2)-Re(1) 125.0(8)

C(4)-N(3)-C(21) 119.7(9)

C(4)-N(3)-Re(1) 120.3(7)

C(21)-N(3)-Re(1) 119.4(6)

C(31)-N(4)-C(40) 120.3(9)

C(31)-N(4)-C(4) 119.2(9)

C(40)-N(4)-C(4) 118.8(10)

O(1)-C(1)-Re(1) 177.1(12)

O(2)-C(2)-Re(1) 177.3(11)

O(3)-C(3)-Re(1) 178.2(10)

O(4)-C(4)-N(3) 123.2(10)

O(4)-C(4)-N(4) 118.8(10)

N(3)-C(4)-N(4) 118.0(10)

C(12)-C(11)-N(1) 122.6(12)

C(11)-C(12)-C(13) 119.5(13)

C(12)-C(13)-C(14) 119.2(12)

C(15)-C(14)-C(13) 118.1(13)

N(1)-C(15)-C(14) 122.8(12)

N(1)-C(15)-C(16) 114.8(9)

C(14)-C(15)-C(16) 122.4(12)

N(2)-C(16)-C(17) 122.0(11)

N(2)-C(16)-C(15) 114.3(10)

C(17)-C(16)-C(15) 123.7(11)

C(18)-C(17)-C(16) 119.5(13)

C(19)-C(18)-C(17) 119.7(13)

C(18)-C(19)-C(20) 118.4(13)

N(2)-C(20)-C(19) 123.8(12)

C(26)-C(21)-C(22) 117.4(10)

C(26)-C(21)-N(3) 119.4(10)

C(22)-C(21)-N(3) 123.1(10)

C(21)-C(22)-C(23) 119.6(12)

C(24)-C(23)-C(22) 121.7(14)

C(25)-C(24)-C(23) 118.3(12)

C(25)-C(24)-C(27) 122.9(15)

C(23)-C(24)-C(27) 118.8(16)

C(24)-C(25)-C(26) 121.1(12)

C(21)-C(26)-C(25) 121.8(12)

C(36)-C(31)-C(32) 118.9(11)

C(36)-C(31)-N(4) 120.8(10)

C(32)-C(31)-N(4) 120.2(11)

C(31)-C(32)-C(33) 118.8(12)

C(34)-C(33)-C(32) 122.1(13)

C(35)-C(34)-C(33) 118.2(13)

C(34)-C(35)-C(36) 120.8(13)

C(35)-C(36)-C(31) 121.2(13)

_____________________________________________________________

Symmetry transformations used to generate equivalent atoms:

Table 8. Anisotropic displacement parameters (≈2x 103) for **5** The anisotropic

displacement factor exponent takes the form: -22[ h2 a*2U11 + ... + 2 h k a* b* U12 ]

______________________________________________________________________________

U11 U22 U33 U23 U13 U12

______________________________________________________________________________

Re(1) 38(1) 28(1) 40(1) 6(1) 10(1) 3(1)

N(1) 19(4) 27(5) 39(6) 15(4) -7(4) 3(4)

N(2) 47(6) 30(5) 28(6) 5(4) 9(5) -1(5)

N(3) 34(5) 20(5) 45(6) -2(4) 14(4) -1(4)

N(4) 29(5) 24(5) 71(8) 2(5) 9(5) -2(4)

C(1) 39(7) 44(8) 56(9) 11(6) 15(6) -3(6)

O(1) 87(7) 58(7) 96(9) 22(6) 35(6) -18(6)

C(2) 39(7) 40(7) 47(8) 5(6) 3(6) 5(6)

O(2) 49(5) 57(6) 107(9) 37(6) 6(5) 24(5)

C(3) 24(6) 61(9) 48(9) 31(7) 2(6) -10(6)

O(3) 81(7) 95(8) 38(7) -16(6) 8(5) 4(6)

C(4) 36(6) 37(7) 42(8) 4(6) 0(6) -6(5)

O(4) 62(6) 38(5) 64(7) -14(4) 32(5) 0(4)

C(11) 34(6) 39(7) 57(9) 4(6) 13(6) 12(6)

C(12) 47(8) 51(9) 81(12) 5(8) 15(8) 12(7)

C(13) 32(7) 64(10) 91(13) 24(9) 2(7) 23(7)

C(14) 47(8) 67(9) 46(9) 16(7) 2(7) 4(7)

C(15) 32(6) 44(7) 42(8) 18(6) -2(6) -9(6)

C(16) 43(6) 30(6) 44(8) 13(6) 12(6) -3(6)

C(17) 59(8) 63(9) 35(8) 2(6) -3(6) -5(7)

C(18) 77(10) 77(11) 40(9) -17(8) -1(8) 4(9)

C(19) 77(10) 50(9) 59(10) -30(7) 24(8) -10(7)

C(20) 55(8) 21(6) 67(10) 0(6) 20(7) -9(6)

C(21) 45(7) 27(6) 28(7) -3(5) 5(5) 7(5)

C(22) 59(8) 39(7) 37(8) 14(6) 7(6) -2(6)

C(23) 106(13) 64(10) 41(9) 3(7) 29(9) -28(9)

C(24) 68(9) 53(9) 79(12) -16(8) 40(9) 6(8)

C(25) 53(8) 43(8) 62(10) 2(7) 24(7) 4(6)

C(26) 45(7) 34(7) 48(8) 8(5) 20(6) 1(5)

C(27) 125(16) 139(18) 85(14) -42(12) 64(12) -7(13)

C(31) 43(7) 36(7) 43(8) -7(6) 12(6) 3(6)

C(32) 54(8) 34(7) 67(10) -5(7) -4(7) -4(6)

C(33) 61(9) 64(10) 64(11) -14(8) -24(8) 15(8)

C(34) 119(15) 34(8) 55(10) 2(7) -5(10) 16(9)

C(35) 84(11) 33(8) 51(9) 4(6) 19(8) 0(7)

C(36) 60(8) 33(7) 44(8) 3(6) 15(6) -7(6)

C(40) 58(9) 36(7) 85(11) 6(7) 18(8) 0(6)

______________________________________________________________________________

Table 9. Hydrogen coordinates ( x 104) and isotropic displacement parameters (Å 2x 10 3)

for **5**

________________________________________________________________________________

x y z U(eq)

________________________________________________________________________________

H(11) 164 1878 11107 51

H(12) -1513 2378 10027 71

H(13) -2162 2269 7779 76

H(14) -1064 1640 6661 65

H(17) -87 993 5800 64

H(18) 1221 373 4976 79

H(19) 2904 -41 6379 72

H(20) 3236 178 8562 56

H(22) 3092 1819 7109 54

H(23) 4299 1490 5545 82

H(25) 6728 731 8303 61

H(26) 5576 1061 9881 49

H(27A) 7196 702 6039 167

H(27B) 6406 1093 5017 167

H(27C) 5790 540 5261 167

H(32) 1544 2640 8465 64

H(33) 567 3371 7382 80

H(34) 1817 4105 7048 86

H(35) 4085 4089 7746 66

H(36) 5079 3373 8834 54

H(40A) 5860 2480 8901 88

H(40B) 5724 2149 10168 88

H(40C) 5781 2766 10245 88

________________________________________________________________________________


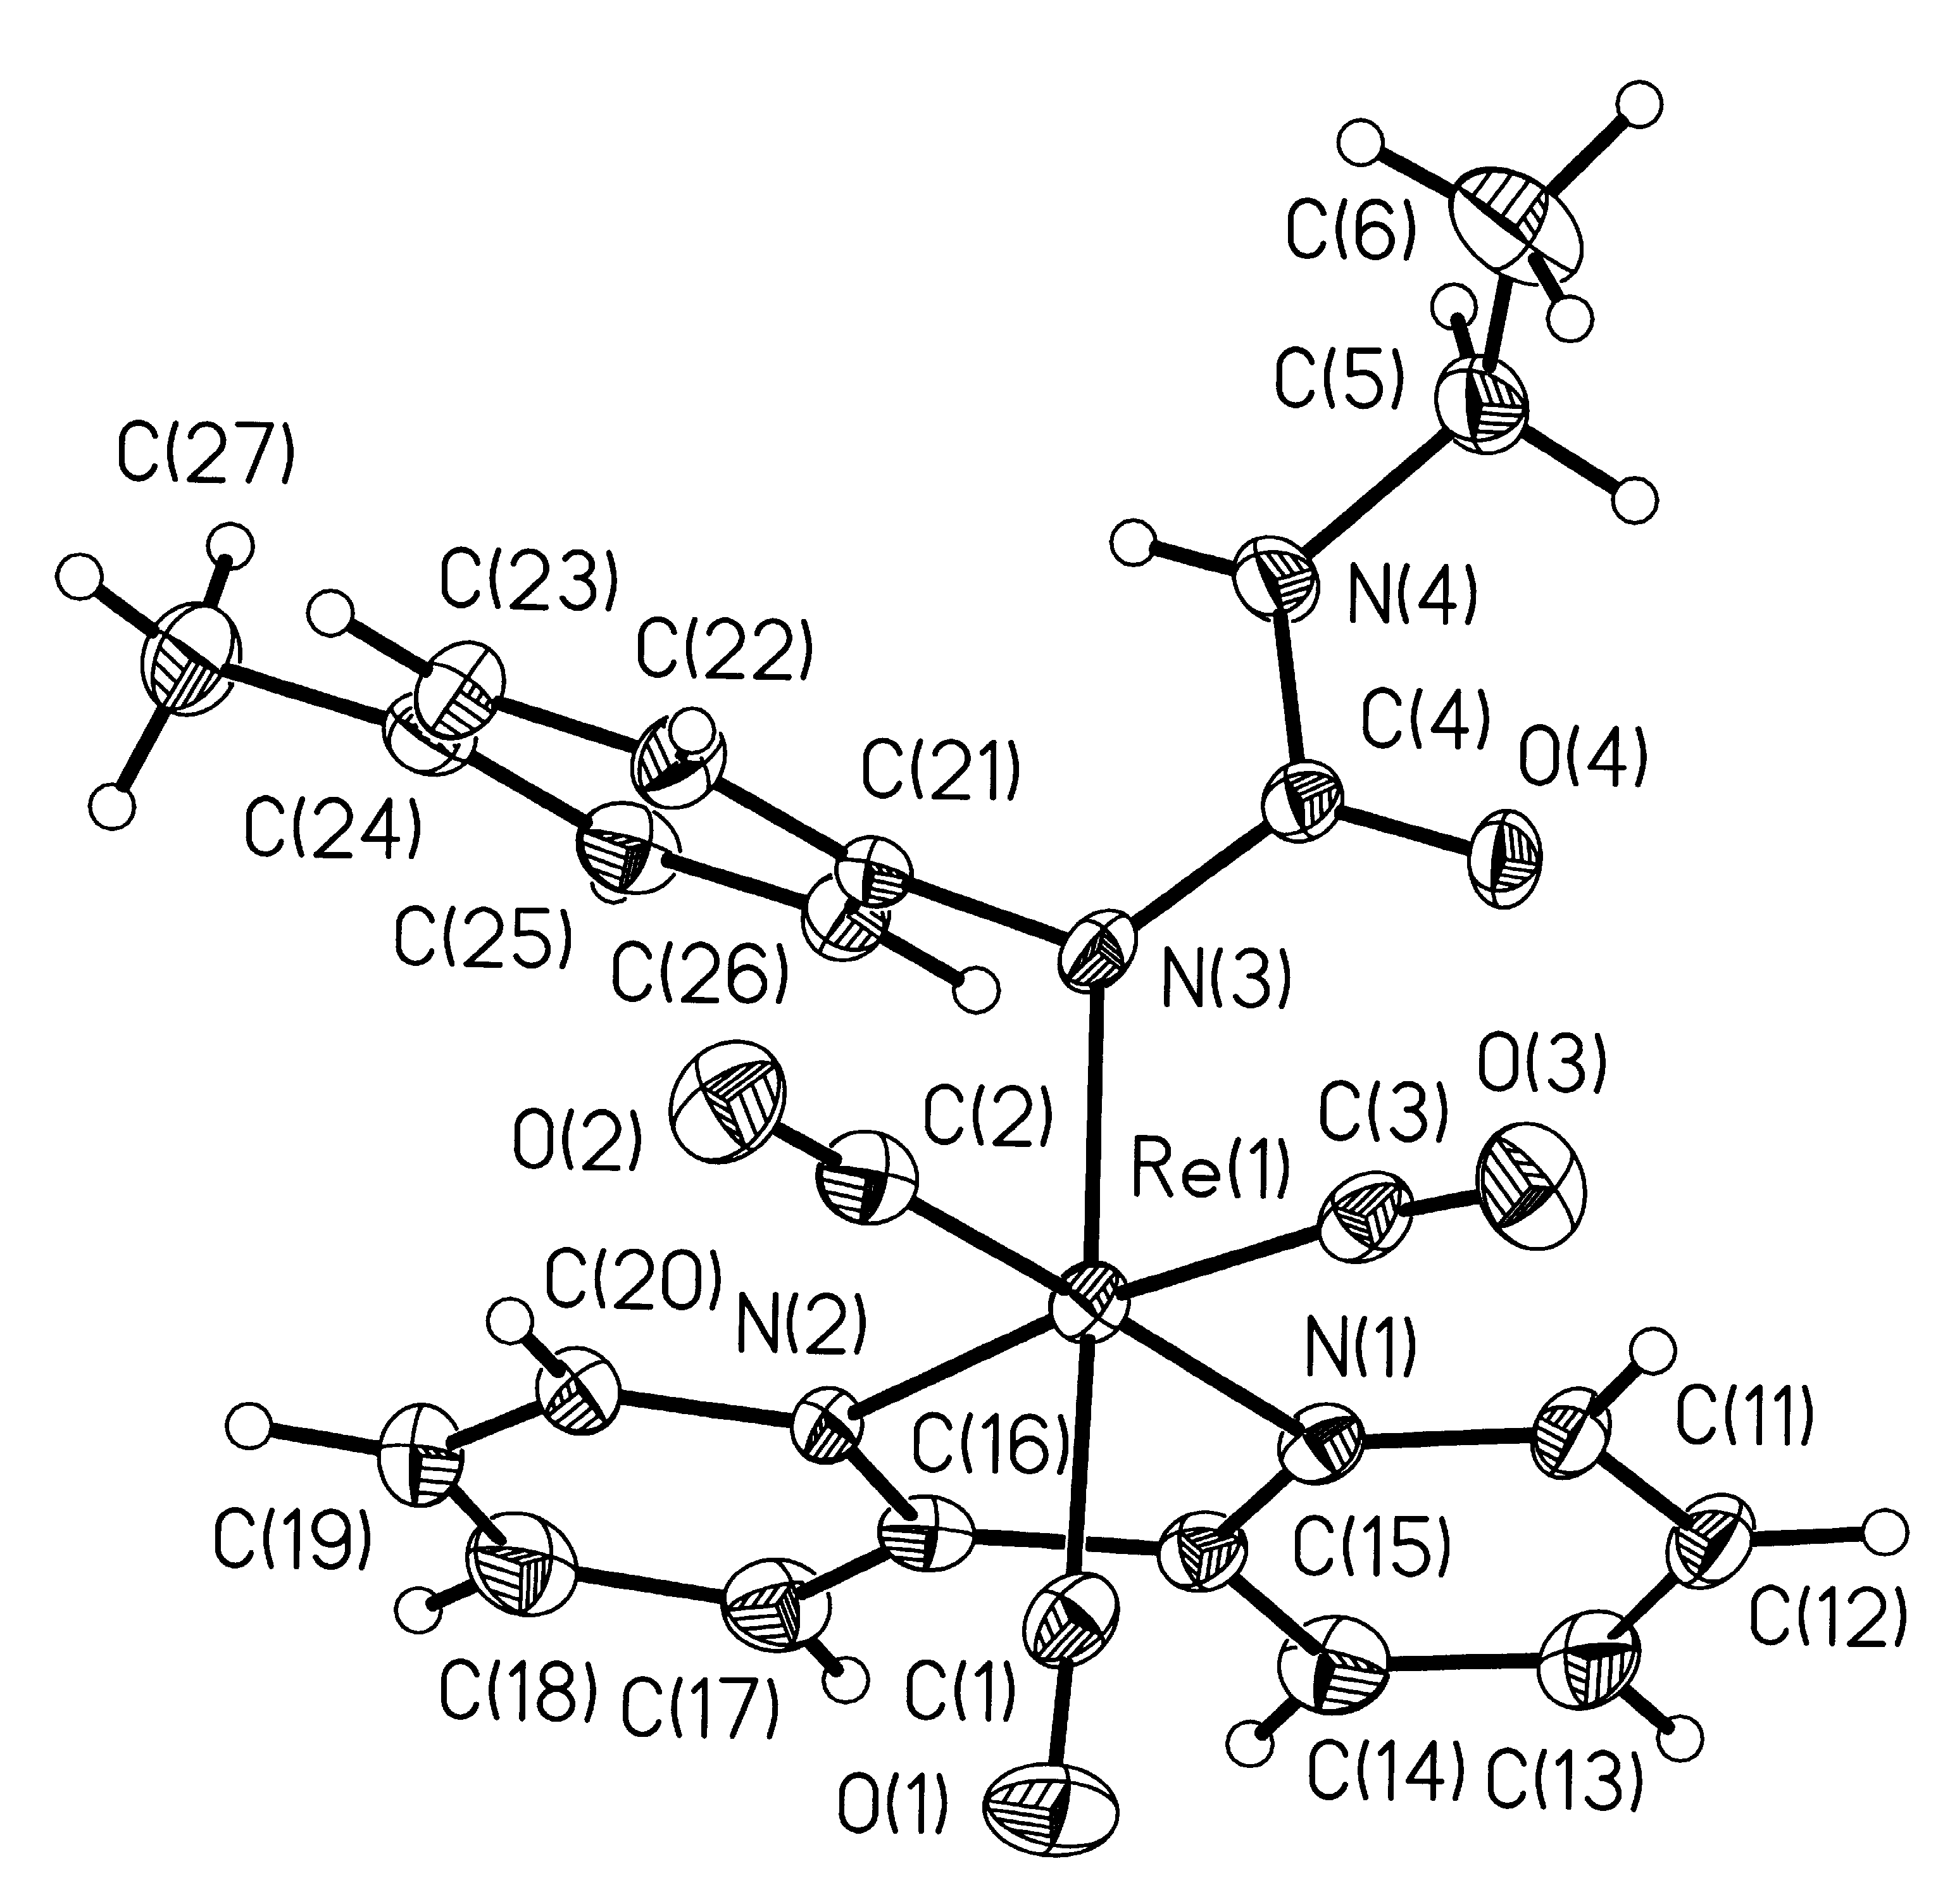


#### Molecular structure of 4a

**
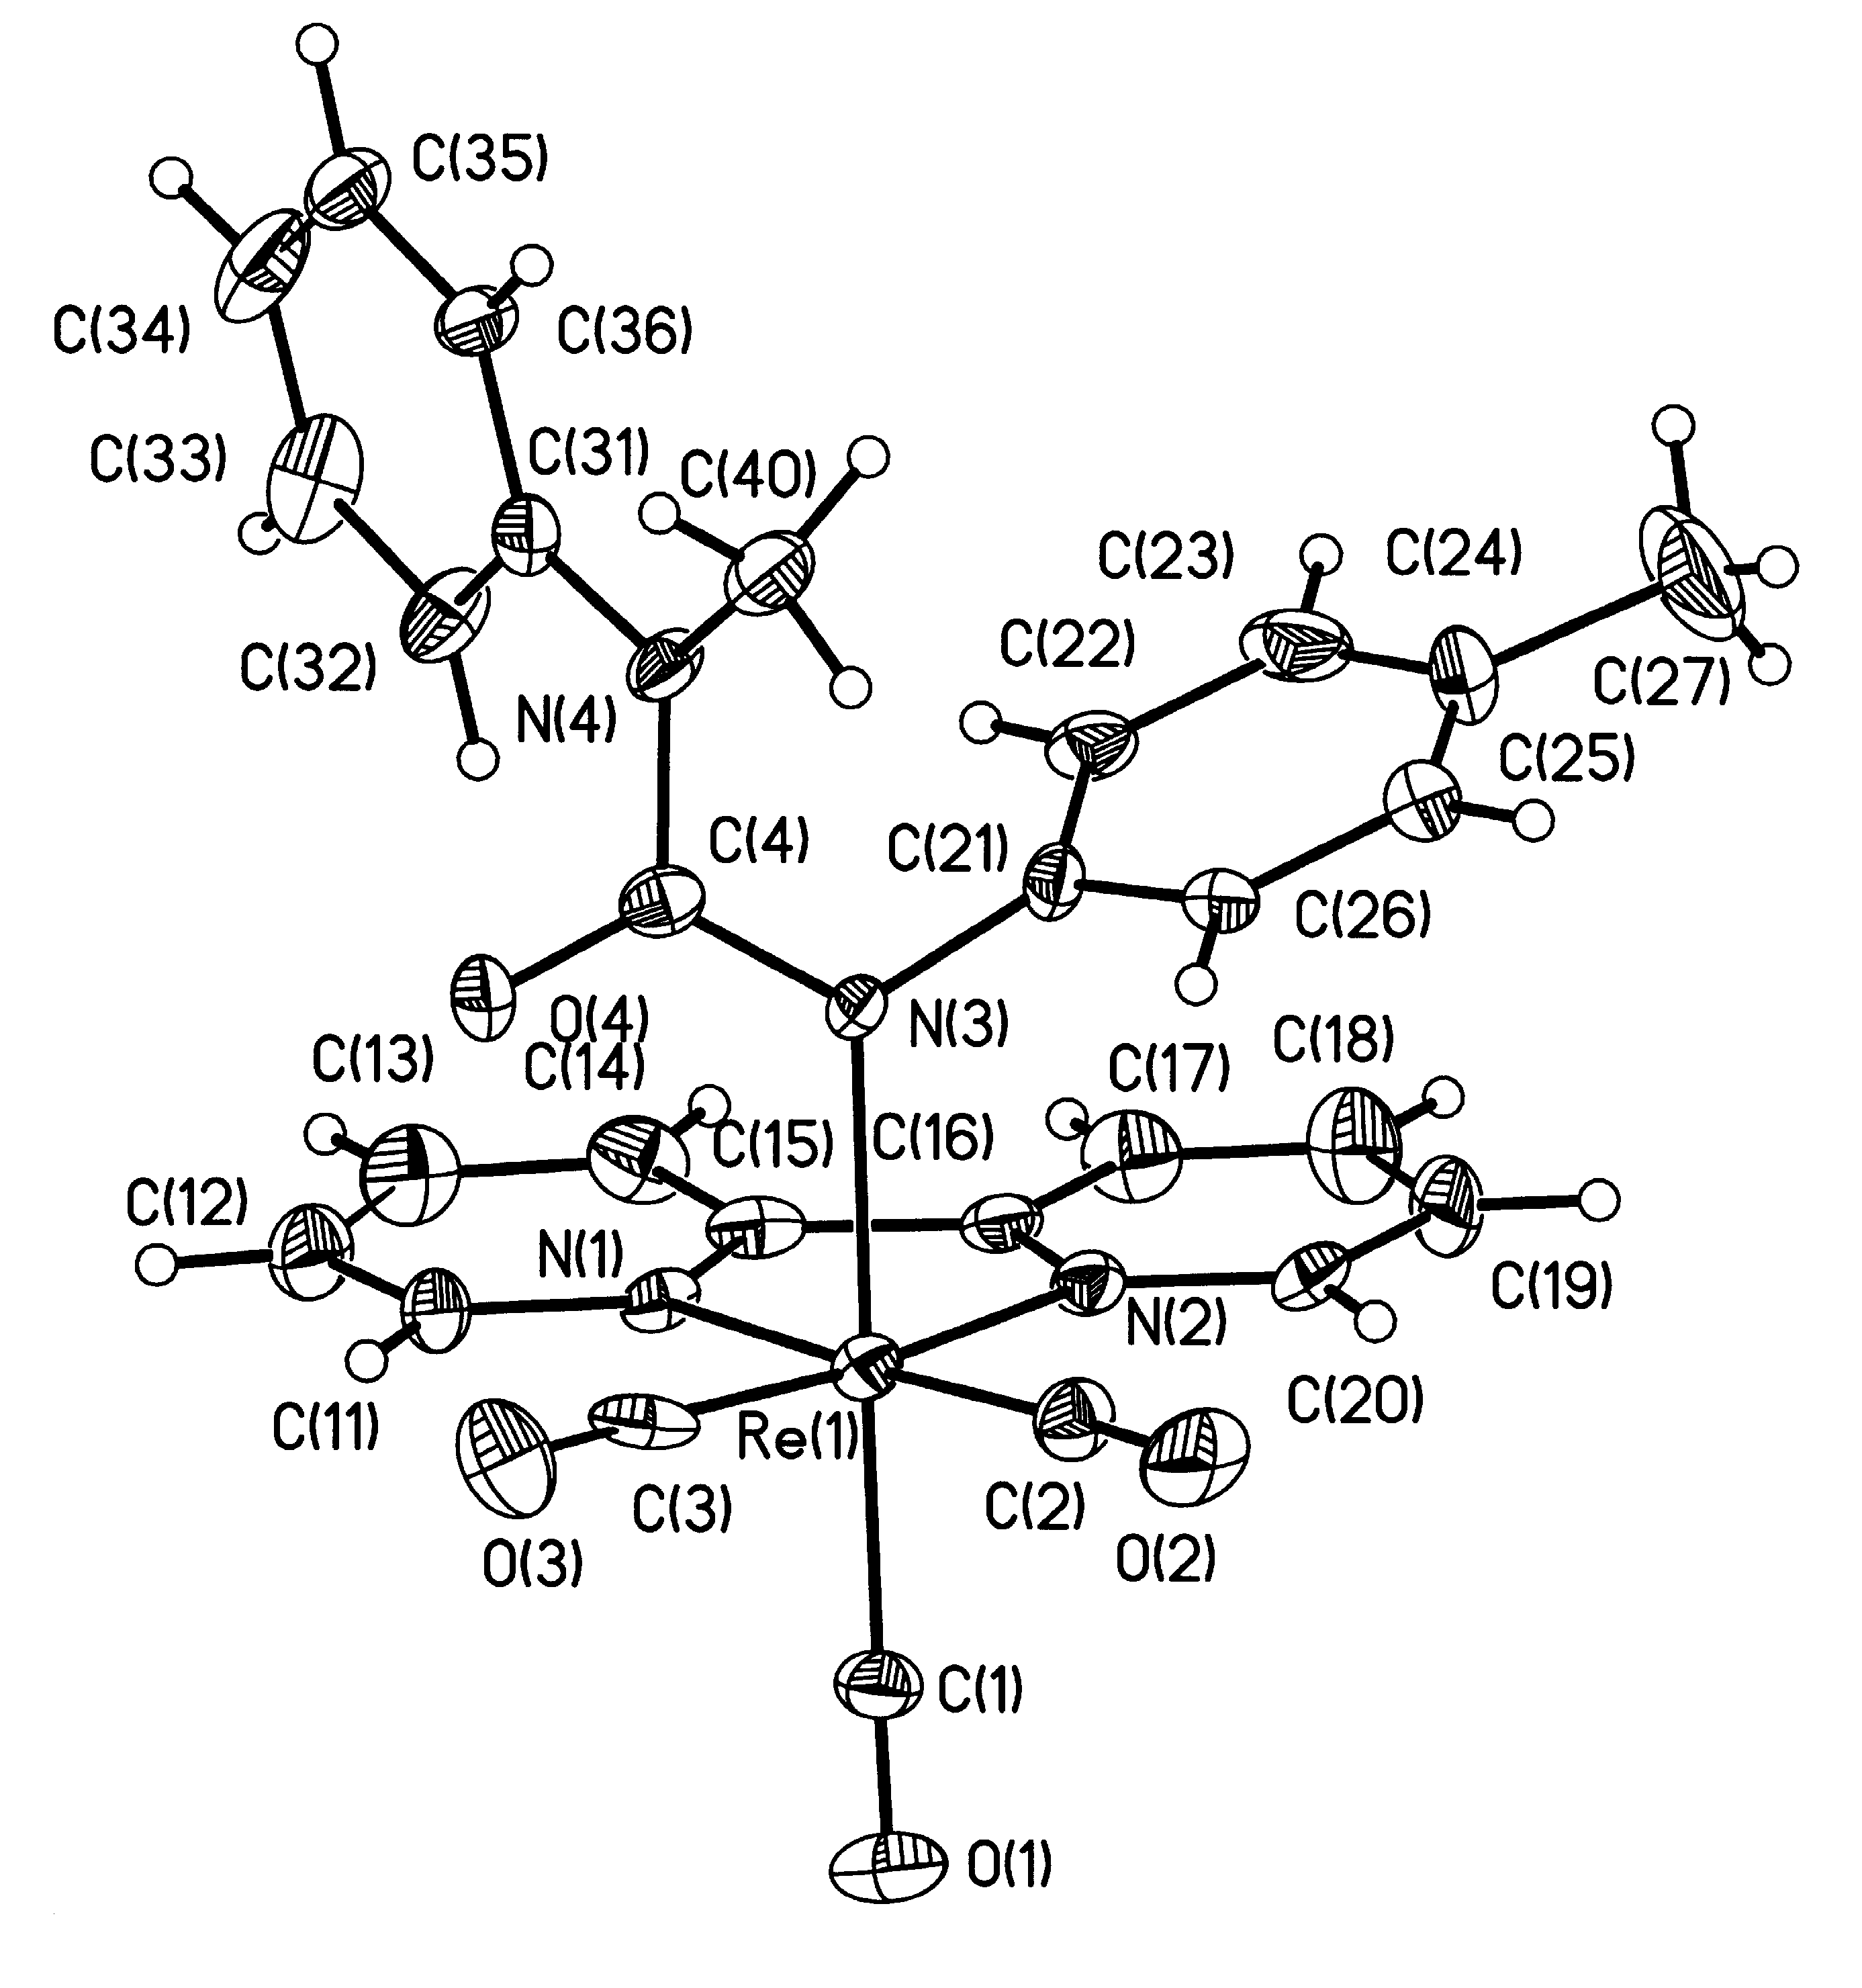
**

##### Molecular structure of 5

1. J. Guerrero, O. E. Pino, E. Wolcan, M. R. Feliz, G. Ferraudi, S. A. Moya, *Organometallics* 2001, **20**, 2842. [↑](#footnote-ref-2)
2. SAINT+. SAX area detector integration program. Version 6.02. Bruker AXS, Inc. Madison, WI, 1999. [↑](#footnote-ref-3)
3. G. M. Sheldrick, SHELXTL, An integrated system for solving, refining, and displaying crystal structures from diffraction data. Version 5.1. Bruker AXS, Inc. Madison, WI, 1998. [↑](#footnote-ref-4)
4. G. M. Sheldrick, SADABS, Empirical Absorption Correction Program. University of Göttingen: Göttingen, Germany, 1997. [↑](#footnote-ref-5)
